# Supplementary material
Source: PubMed Central journal article supplement (PMC2951870)

**Supplemental Figure 1.** *UAS:kis RNAi* constructs reduce Kis protein expression *in vivo*. (A-F) Third instar larval wing discs stained for Kis protein expression. Anterior right. (A-B) Wild type Kis protein expression (magenta) is uniform throughout wing. GFP (green) is expressed by *engrailed-Gal4*, and marks the posterior compartment of these discs. (*engrailed-Gal4 / +*). (B) Kis protein (white) from panel (A). (C-D) Expression of Kis protein (magenta) in wing discs expressing *UAS:kis RNAi.a* in the posterior compartment. (*engrailed-Gal4 / UAS:kis RNAi.a*). (D) Kis protein (white) from panel (C). Note decreased Kis protein expression in posterior compartment compared to anterior. (E-F) Expression of Kis protein (magenta) in wing discs expressing *UAS:kis RNAi.b* in the posterior compartment. (*engrailed-Gal4 / UAS:kis RNAi.b*). (F) Kis protein (white) from panel (E). Note decreased Kis protein expression in posterior compartment.

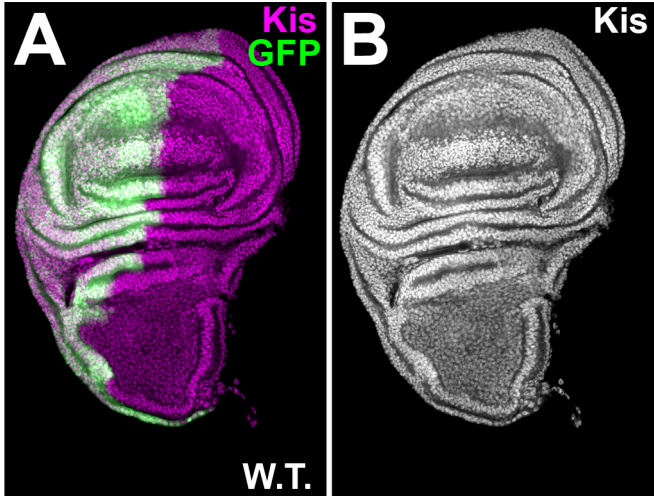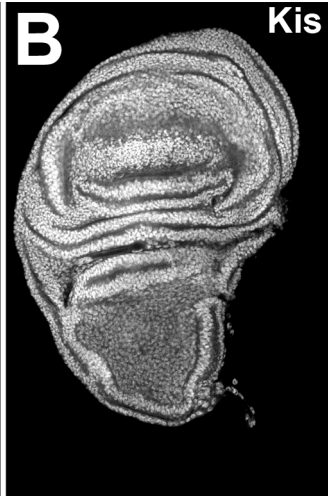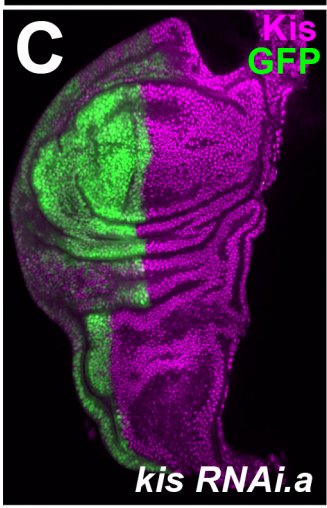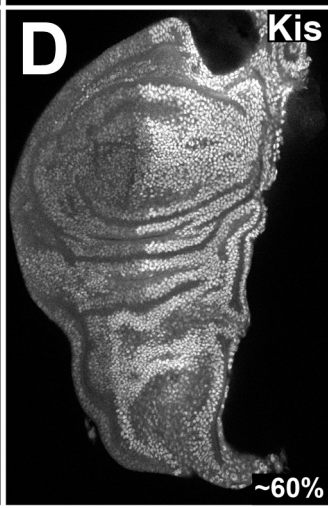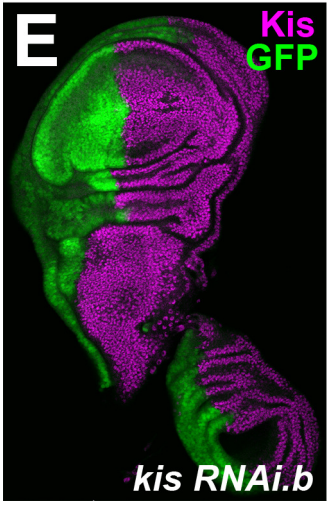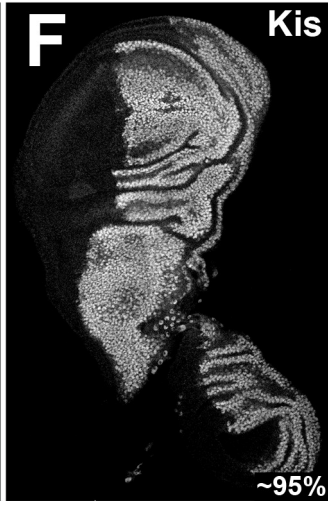

Supplement: supp_ddq348_ddq348supp_fig.pdf [file supp_ddq348_ddq348supp_fig.pdf]
