# Supplementary material
Source: PubMed Central journal article supplement (PMC2951870)
Supplement: supp_ddq348_ddq348supp_table.pdf [file supp_ddq348_ddq348supp_table.pdf]

Supplemental TABLE I.

Anatomical defects observed in *kismet* RNAi knockdown DC neurons

| Neuron              | Gal4-line | n  | Defects observed                                         | %                 | P                       |
|---------------------|-----------|----|----------------------------------------------------------|-------------------|-------------------------|
| <u>D.C. Neurons</u> | Atonal    |    |                                                          |                   |                         |
| - control           |           | 26 | cell migration<br>axon migration<br>cells out of cluster | 11%<br>4%<br>0%   |                         |
| - <i>kis RNAi.a</i> |           | 30 | cell migration<br>axon migration<br>cells out of cluster | 77%<br>53%<br>40% | <.001<br><.001<br><.001 |
| - <i>kis RNAi.b</i> |           | 28 | cell migration<br>axon migration<br>cells out of cluster | 25%<br>22%<br>43% | NS<br><.05<br><.001     |

Quantification of larval DC neuron defects observed in different *kis RNAi* lines. Genotypes are: Control: *Atonal-Gal4 / w*. Experimental: *Atonal-Gal4 / UAS:kis RNAi.a*, and *Atonal-Gal4 / UAS:kis RNAi.b*.
